# Supplementary material
Source: MDPI journal article supplement (https://www.mdpi.com/2071-1050/9/11/2033)
Supplement: s1 [file s1]

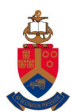

UNIVERSITEIT VAN PRETORIA  
UNIVERSITY OF PRETORIA  
YUNIBESITHI YA PRETORIA

# RECYCLING IN ENCLOSED RESIDENTIAL DEVELOPMENTS

Questionnaire number

|  |  |  |  |  |  |  |  |
|--|--|--|--|--|--|--|--|
|  |  |  |  |  |  |  |  |
|--|--|--|--|--|--|--|--|

(To be completed by fieldworker)

## INFORMED CONSENT AND INSTRUCTIONS

This study is about your views on recycling in enclosed residential developments. Recycling is defined here as the separation of any recyclable material (i.e., paper, glass, metal and plastic) from household waste by the household itself for collection by or drop-off at any scheme other than the municipal system.

This questionnaire, including all questions in it, is voluntary and all your responses will be anonymous. Data will be analysed on an aggregate level and will not be singled out for any particular household. The findings may be submitted to an academic journal for publication. By completing and returning this questionnaire, you understand that (1) the questionnaire is voluntary, (2) your responses will be anonymous, and (3) the findings may be used for publication.

Please nominate an adult member of the household of 19 years or older that would be most suitable to answer this questionnaire. The examples on the right will assist you in completing the questionnaire accurately.

### EXAMPLES

Tick

|   |                                     |
|---|-------------------------------------|
| 1 | <input checked="" type="checkbox"/> |
| 2 | <input type="checkbox"/>            |

Figure

|  |   |   |
|--|---|---|
|  | 2 | 7 |
|--|---|---|

Coding on the right is for data capturing and can be ignored.

## SECTION 1. SOCIO-DEMOGRAPHIC INFORMATION

1.1. What is your sex? (Please tick one option only)

Female

|   |                          |
|---|--------------------------|
| 1 | <input type="checkbox"/> |
| 2 | <input type="checkbox"/> |

Male

V1

1.2. What is your age? (Please tick one option only)

19-35 Years

|   |                          |
|---|--------------------------|
| 1 | <input type="checkbox"/> |
| 2 | <input type="checkbox"/> |
| 3 | <input type="checkbox"/> |

36-59 Years

60 Years or older

V2

1.3. What is the highest level of education that you have completed? (Please tick one option only)

No schooling or some schooling

|   |                          |
|---|--------------------------|
| 1 | <input type="checkbox"/> |
| 2 | <input type="checkbox"/> |
| 3 | <input type="checkbox"/> |
| 4 | <input type="checkbox"/> |
| 5 | <input type="checkbox"/> |

Matric/Grade 12

Certificate or diploma

Bachelors or honours degree

Master's or doctoral degree

V3

1.4. How many members, including yourself, does your household have?

Number of household members

|  |  |
|--|--|
|  |  |
|--|--|

V4

1.5. Of the above number at 1.4, how many are children of 18 years old or younger? (Please indicate '0' if none)

Number of children (18 or younger)

|  |  |
|--|--|
|  |  |
|--|--|

V5

1.6. Of the above number at 1.4, how many are adults of 60 years old or older? (Please indicate '0' if none)

Number of adults (60 or older)

|  |  |
|--|--|
|  |  |
|--|--|

V6

1.7. What is your position in the household? (Please tick one option only)

Head of the household  
 Spouse of the head of the household  
 Other (e.g., dependent) or not applicable (e.g., cohabiting)

|   |
|---|
| 1 |
| 2 |
| 3 |

V7

## SECTION 2. RECYCLING INFORMATION

2.1. Please indicate the extent to which you agree or disagree with the following statements:

(Please skip items where you are not sure about your answer)

|                                                                               | Agree completely | Agree to some extent | Neither agree nor disagree | Disagree to some extent | Disagree completely |     |
|-------------------------------------------------------------------------------|------------------|----------------------|----------------------------|-------------------------|---------------------|-----|
| Recycling is important for the sake of the environment                        | 1                | 2                    | 3                          | 4                       | 5                   | V8  |
| Recycling is not worth the cost incurred by recycling companies               | 1                | 2                    | 3                          | 4                       | 5                   | V9  |
| Recycling is important to help reduce waste in municipal landfills            | 1                | 2                    | 3                          | 4                       | 5                   | V10 |
| Recycling is not worth the effort incurred by households                      | 1                | 2                    | 3                          | 4                       | 5                   | V11 |
| My family and friends would like me to recycle my household waste             | 1                | 2                    | 3                          | 4                       | 5                   | V12 |
| My neighbours would approve of me recycling my household waste                | 1                | 2                    | 3                          | 4                       | 5                   | V13 |
| My local authority (City of Tshwane) expects me to recycle my household waste | 1                | 2                    | 3                          | 4                       | 5                   | V14 |

2.2. On a scale of 1 to 5, with '1' being 'not at all' and '5' being 'to a large extent', to what extent...

(Please skip items where you are not sure about your answer)

|                                                                                                              | Not at all |   |   | To a large extent |   |     |
|--------------------------------------------------------------------------------------------------------------|------------|---|---|-------------------|---|-----|
| ...do you have information on what, where, when and how to recycle?                                          | 1          | 2 | 3 | 4                 | 5 | V15 |
| ...is there sufficient space or facilities within your house to do recycling?                                | 1          | 2 | 3 | 4                 | 5 | V16 |
| ...is there sufficient space or facilities in your yard to do recycling?                                     | 1          | 2 | 3 | 4                 | 5 | V17 |
| ...is there sufficient space or facilities inside your complex/estate to do recycling?                       | 1          | 2 | 3 | 4                 | 5 | V18 |
| ...does your body corporate or resident association promote or support recycling inside your complex/estate? | 1          | 2 | 3 | 4                 | 5 | V19 |
| ...do recycling companies have access to your complex/estate to collect recyclables?                         | 1          | 2 | 3 | 4                 | 5 | V20 |
| ...do you have access to a kerbside or collection point for recycling just outside your complex/estate?      | 1          | 2 | 3 | 4                 | 5 | V21 |

2.3. Has your household recycled any paper, glass, metal or plastic in the last three months? (Please tick one option only)

Yes  
 No (Skip to Q2.6)

|   |
|---|
| 1 |
| 2 |

V22

|                                                                                                              |                                               |                                               |     |     |
|--------------------------------------------------------------------------------------------------------------|-----------------------------------------------|-----------------------------------------------|-----|-----|
| <b>2.4. Who is primarily responsible for recycling in your household? (Please tick all relevant options)</b> | Head of the household                         | <table border="1"><tr><td>1</td></tr></table> | 1   | V23 |
|                                                                                                              | 1                                             |                                               |     |     |
|                                                                                                              | Spouse of the head of the household           | <table border="1"><tr><td>1</td></tr></table> | 1   | V24 |
|                                                                                                              | 1                                             |                                               |     |     |
| The domestic worker or gardener                                                                              | <table border="1"><tr><td>1</td></tr></table> | 1                                             | V25 |     |
| 1                                                                                                            |                                               |                                               |     |     |
| Other (e.g., dependants, cohabitants)                                                                        | <table border="1"><tr><td>1</td></tr></table> | 1                                             | V26 |     |
| 1                                                                                                            |                                               |                                               |     |     |

**2.5. Please indicate what, where and how often your household has recycled in the last three months, with '1' being 'on a weekly basis', '2' being 'monthly' and '3' being 'less than monthly'.**

|                                                              |                                                                   |                                                                    |   |   |                                                                   |                                                                   |   |                                                                                             |                                                                   |                                                                   |                 |   |                                                                   |                                                                   |   |   |                                                                   |                                                                   |   |   |                                                                   |                                                                   |   |   |                                                                   |                                                                   |   |   |                                                                   |                                                                   |   |   |                                                                   |                                                                   |   |   |                                                                   |                                                                   |   |   |                                                                   |                                                                   |   |   |                                                                   |                                                                   |   |   |        |        |
|--------------------------------------------------------------|-------------------------------------------------------------------|--------------------------------------------------------------------|---|---|-------------------------------------------------------------------|-------------------------------------------------------------------|---|---------------------------------------------------------------------------------------------|-------------------------------------------------------------------|-------------------------------------------------------------------|-----------------|---|-------------------------------------------------------------------|-------------------------------------------------------------------|---|---|-------------------------------------------------------------------|-------------------------------------------------------------------|---|---|-------------------------------------------------------------------|-------------------------------------------------------------------|---|---|-------------------------------------------------------------------|-------------------------------------------------------------------|---|---|-------------------------------------------------------------------|-------------------------------------------------------------------|---|---|-------------------------------------------------------------------|-------------------------------------------------------------------|---|---|-------------------------------------------------------------------|-------------------------------------------------------------------|---|---|-------------------------------------------------------------------|-------------------------------------------------------------------|---|---|-------------------------------------------------------------------|-------------------------------------------------------------------|---|---|--------|--------|
| (Please skip items where you are not sure about your answer) | Subscription to a private company (e.g., Blue Sky)                | Drop-off on a kerbside (either in- or outside your complex/estate) |   |   | Drop-off at a collection point inside your complex/estate         |                                                                   |   | Drop-off at a collection point outside your complex/estate (e.g., a school, church or mall) |                                                                   |                                                                   | Other (Specify) |   |                                                                   |                                                                   |   |   |                                                                   |                                                                   |   |   |                                                                   |                                                                   |   |   |                                                                   |                                                                   |   |   |                                                                   |                                                                   |   |   |                                                                   |                                                                   |   |   |                                                                   |                                                                   |   |   |                                                                   |                                                                   |   |   |                                                                   |                                                                   |   |   |        |        |
|                                                              | Paper                                                             | <table border="1"><tr><td>1</td><td>2</td><td>3</td></tr></table>  | 1 | 2 | 3                                                                 | <table border="1"><tr><td>1</td><td>2</td><td>3</td></tr></table> | 1 | 2                                                                                           | 3                                                                 | <table border="1"><tr><td>1</td><td>2</td><td>3</td></tr></table> | 1               | 2 | 3                                                                 | <table border="1"><tr><td>1</td><td>2</td><td>3</td></tr></table> | 1 | 2 | 3                                                                 | <table border="1"><tr><td>1</td><td>2</td><td>3</td></tr></table> | 1 | 2 | 3                                                                 | <table border="1"><tr><td>1</td><td>2</td><td>3</td></tr></table> | 1 | 2 | 3                                                                 | <table border="1"><tr><td>1</td><td>2</td><td>3</td></tr></table> | 1 | 2 | 3                                                                 | <table border="1"><tr><td>1</td><td>2</td><td>3</td></tr></table> | 1 | 2 | 3                                                                 | <table border="1"><tr><td>1</td><td>2</td><td>3</td></tr></table> | 1 | 2 | 3                                                                 | <table border="1"><tr><td>1</td><td>2</td><td>3</td></tr></table> | 1 | 2 | 3                                                                 | <table border="1"><tr><td>1</td><td>2</td><td>3</td></tr></table> | 1 | 2 | 3                                                                 | <table border="1"><tr><td>1</td><td>2</td><td>3</td></tr></table> | 1 | 2 | 3      | V27-31 |
|                                                              | 1                                                                 | 2                                                                  | 3 |   |                                                                   |                                                                   |   |                                                                                             |                                                                   |                                                                   |                 |   |                                                                   |                                                                   |   |   |                                                                   |                                                                   |   |   |                                                                   |                                                                   |   |   |                                                                   |                                                                   |   |   |                                                                   |                                                                   |   |   |                                                                   |                                                                   |   |   |                                                                   |                                                                   |   |   |                                                                   |                                                                   |   |   |                                                                   |                                                                   |   |   |        |        |
|                                                              | 1                                                                 | 2                                                                  | 3 |   |                                                                   |                                                                   |   |                                                                                             |                                                                   |                                                                   |                 |   |                                                                   |                                                                   |   |   |                                                                   |                                                                   |   |   |                                                                   |                                                                   |   |   |                                                                   |                                                                   |   |   |                                                                   |                                                                   |   |   |                                                                   |                                                                   |   |   |                                                                   |                                                                   |   |   |                                                                   |                                                                   |   |   |                                                                   |                                                                   |   |   |        |        |
|                                                              | 1                                                                 | 2                                                                  | 3 |   |                                                                   |                                                                   |   |                                                                                             |                                                                   |                                                                   |                 |   |                                                                   |                                                                   |   |   |                                                                   |                                                                   |   |   |                                                                   |                                                                   |   |   |                                                                   |                                                                   |   |   |                                                                   |                                                                   |   |   |                                                                   |                                                                   |   |   |                                                                   |                                                                   |   |   |                                                                   |                                                                   |   |   |                                                                   |                                                                   |   |   |        |        |
| 1                                                            | 2                                                                 | 3                                                                  |   |   |                                                                   |                                                                   |   |                                                                                             |                                                                   |                                                                   |                 |   |                                                                   |                                                                   |   |   |                                                                   |                                                                   |   |   |                                                                   |                                                                   |   |   |                                                                   |                                                                   |   |   |                                                                   |                                                                   |   |   |                                                                   |                                                                   |   |   |                                                                   |                                                                   |   |   |                                                                   |                                                                   |   |   |                                                                   |                                                                   |   |   |        |        |
| 1                                                            | 2                                                                 | 3                                                                  |   |   |                                                                   |                                                                   |   |                                                                                             |                                                                   |                                                                   |                 |   |                                                                   |                                                                   |   |   |                                                                   |                                                                   |   |   |                                                                   |                                                                   |   |   |                                                                   |                                                                   |   |   |                                                                   |                                                                   |   |   |                                                                   |                                                                   |   |   |                                                                   |                                                                   |   |   |                                                                   |                                                                   |   |   |                                                                   |                                                                   |   |   |        |        |
| 1                                                            | 2                                                                 | 3                                                                  |   |   |                                                                   |                                                                   |   |                                                                                             |                                                                   |                                                                   |                 |   |                                                                   |                                                                   |   |   |                                                                   |                                                                   |   |   |                                                                   |                                                                   |   |   |                                                                   |                                                                   |   |   |                                                                   |                                                                   |   |   |                                                                   |                                                                   |   |   |                                                                   |                                                                   |   |   |                                                                   |                                                                   |   |   |                                                                   |                                                                   |   |   |        |        |
| 1                                                            | 2                                                                 | 3                                                                  |   |   |                                                                   |                                                                   |   |                                                                                             |                                                                   |                                                                   |                 |   |                                                                   |                                                                   |   |   |                                                                   |                                                                   |   |   |                                                                   |                                                                   |   |   |                                                                   |                                                                   |   |   |                                                                   |                                                                   |   |   |                                                                   |                                                                   |   |   |                                                                   |                                                                   |   |   |                                                                   |                                                                   |   |   |                                                                   |                                                                   |   |   |        |        |
| 1                                                            | 2                                                                 | 3                                                                  |   |   |                                                                   |                                                                   |   |                                                                                             |                                                                   |                                                                   |                 |   |                                                                   |                                                                   |   |   |                                                                   |                                                                   |   |   |                                                                   |                                                                   |   |   |                                                                   |                                                                   |   |   |                                                                   |                                                                   |   |   |                                                                   |                                                                   |   |   |                                                                   |                                                                   |   |   |                                                                   |                                                                   |   |   |                                                                   |                                                                   |   |   |        |        |
| 1                                                            | 2                                                                 | 3                                                                  |   |   |                                                                   |                                                                   |   |                                                                                             |                                                                   |                                                                   |                 |   |                                                                   |                                                                   |   |   |                                                                   |                                                                   |   |   |                                                                   |                                                                   |   |   |                                                                   |                                                                   |   |   |                                                                   |                                                                   |   |   |                                                                   |                                                                   |   |   |                                                                   |                                                                   |   |   |                                                                   |                                                                   |   |   |                                                                   |                                                                   |   |   |        |        |
| 1                                                            | 2                                                                 | 3                                                                  |   |   |                                                                   |                                                                   |   |                                                                                             |                                                                   |                                                                   |                 |   |                                                                   |                                                                   |   |   |                                                                   |                                                                   |   |   |                                                                   |                                                                   |   |   |                                                                   |                                                                   |   |   |                                                                   |                                                                   |   |   |                                                                   |                                                                   |   |   |                                                                   |                                                                   |   |   |                                                                   |                                                                   |   |   |                                                                   |                                                                   |   |   |        |        |
| 1                                                            | 2                                                                 | 3                                                                  |   |   |                                                                   |                                                                   |   |                                                                                             |                                                                   |                                                                   |                 |   |                                                                   |                                                                   |   |   |                                                                   |                                                                   |   |   |                                                                   |                                                                   |   |   |                                                                   |                                                                   |   |   |                                                                   |                                                                   |   |   |                                                                   |                                                                   |   |   |                                                                   |                                                                   |   |   |                                                                   |                                                                   |   |   |                                                                   |                                                                   |   |   |        |        |
| 1                                                            | 2                                                                 | 3                                                                  |   |   |                                                                   |                                                                   |   |                                                                                             |                                                                   |                                                                   |                 |   |                                                                   |                                                                   |   |   |                                                                   |                                                                   |   |   |                                                                   |                                                                   |   |   |                                                                   |                                                                   |   |   |                                                                   |                                                                   |   |   |                                                                   |                                                                   |   |   |                                                                   |                                                                   |   |   |                                                                   |                                                                   |   |   |                                                                   |                                                                   |   |   |        |        |
| Glass                                                        | <table border="1"><tr><td>1</td><td>2</td><td>3</td></tr></table> | 1                                                                  | 2 | 3 | <table border="1"><tr><td>1</td><td>2</td><td>3</td></tr></table> | 1                                                                 | 2 | 3                                                                                           | <table border="1"><tr><td>1</td><td>2</td><td>3</td></tr></table> | 1                                                                 | 2               | 3 | <table border="1"><tr><td>1</td><td>2</td><td>3</td></tr></table> | 1                                                                 | 2 | 3 | <table border="1"><tr><td>1</td><td>2</td><td>3</td></tr></table> | 1                                                                 | 2 | 3 | <table border="1"><tr><td>1</td><td>2</td><td>3</td></tr></table> | 1                                                                 | 2 | 3 | <table border="1"><tr><td>1</td><td>2</td><td>3</td></tr></table> | 1                                                                 | 2 | 3 | <table border="1"><tr><td>1</td><td>2</td><td>3</td></tr></table> | 1                                                                 | 2 | 3 | <table border="1"><tr><td>1</td><td>2</td><td>3</td></tr></table> | 1                                                                 | 2 | 3 | <table border="1"><tr><td>1</td><td>2</td><td>3</td></tr></table> | 1                                                                 | 2 | 3 | <table border="1"><tr><td>1</td><td>2</td><td>3</td></tr></table> | 1                                                                 | 2 | 3 | <table border="1"><tr><td>1</td><td>2</td><td>3</td></tr></table> | 1                                                                 | 2 | 3 | V32-36 |        |
| 1                                                            | 2                                                                 | 3                                                                  |   |   |                                                                   |                                                                   |   |                                                                                             |                                                                   |                                                                   |                 |   |                                                                   |                                                                   |   |   |                                                                   |                                                                   |   |   |                                                                   |                                                                   |   |   |                                                                   |                                                                   |   |   |                                                                   |                                                                   |   |   |                                                                   |                                                                   |   |   |                                                                   |                                                                   |   |   |                                                                   |                                                                   |   |   |                                                                   |                                                                   |   |   |        |        |
| 1                                                            | 2                                                                 | 3                                                                  |   |   |                                                                   |                                                                   |   |                                                                                             |                                                                   |                                                                   |                 |   |                                                                   |                                                                   |   |   |                                                                   |                                                                   |   |   |                                                                   |                                                                   |   |   |                                                                   |                                                                   |   |   |                                                                   |                                                                   |   |   |                                                                   |                                                                   |   |   |                                                                   |                                                                   |   |   |                                                                   |                                                                   |   |   |                                                                   |                                                                   |   |   |        |        |
| 1                                                            | 2                                                                 | 3                                                                  |   |   |                                                                   |                                                                   |   |                                                                                             |                                                                   |                                                                   |                 |   |                                                                   |                                                                   |   |   |                                                                   |                                                                   |   |   |                                                                   |                                                                   |   |   |                                                                   |                                                                   |   |   |                                                                   |                                                                   |   |   |                                                                   |                                                                   |   |   |                                                                   |                                                                   |   |   |                                                                   |                                                                   |   |   |                                                                   |                                                                   |   |   |        |        |
| 1                                                            | 2                                                                 | 3                                                                  |   |   |                                                                   |                                                                   |   |                                                                                             |                                                                   |                                                                   |                 |   |                                                                   |                                                                   |   |   |                                                                   |                                                                   |   |   |                                                                   |                                                                   |   |   |                                                                   |                                                                   |   |   |                                                                   |                                                                   |   |   |                                                                   |                                                                   |   |   |                                                                   |                                                                   |   |   |                                                                   |                                                                   |   |   |                                                                   |                                                                   |   |   |        |        |
| 1                                                            | 2                                                                 | 3                                                                  |   |   |                                                                   |                                                                   |   |                                                                                             |                                                                   |                                                                   |                 |   |                                                                   |                                                                   |   |   |                                                                   |                                                                   |   |   |                                                                   |                                                                   |   |   |                                                                   |                                                                   |   |   |                                                                   |                                                                   |   |   |                                                                   |                                                                   |   |   |                                                                   |                                                                   |   |   |                                                                   |                                                                   |   |   |                                                                   |                                                                   |   |   |        |        |
| 1                                                            | 2                                                                 | 3                                                                  |   |   |                                                                   |                                                                   |   |                                                                                             |                                                                   |                                                                   |                 |   |                                                                   |                                                                   |   |   |                                                                   |                                                                   |   |   |                                                                   |                                                                   |   |   |                                                                   |                                                                   |   |   |                                                                   |                                                                   |   |   |                                                                   |                                                                   |   |   |                                                                   |                                                                   |   |   |                                                                   |                                                                   |   |   |                                                                   |                                                                   |   |   |        |        |
| 1                                                            | 2                                                                 | 3                                                                  |   |   |                                                                   |                                                                   |   |                                                                                             |                                                                   |                                                                   |                 |   |                                                                   |                                                                   |   |   |                                                                   |                                                                   |   |   |                                                                   |                                                                   |   |   |                                                                   |                                                                   |   |   |                                                                   |                                                                   |   |   |                                                                   |                                                                   |   |   |                                                                   |                                                                   |   |   |                                                                   |                                                                   |   |   |                                                                   |                                                                   |   |   |        |        |
| 1                                                            | 2                                                                 | 3                                                                  |   |   |                                                                   |                                                                   |   |                                                                                             |                                                                   |                                                                   |                 |   |                                                                   |                                                                   |   |   |                                                                   |                                                                   |   |   |                                                                   |                                                                   |   |   |                                                                   |                                                                   |   |   |                                                                   |                                                                   |   |   |                                                                   |                                                                   |   |   |                                                                   |                                                                   |   |   |                                                                   |                                                                   |   |   |                                                                   |                                                                   |   |   |        |        |
| 1                                                            | 2                                                                 | 3                                                                  |   |   |                                                                   |                                                                   |   |                                                                                             |                                                                   |                                                                   |                 |   |                                                                   |                                                                   |   |   |                                                                   |                                                                   |   |   |                                                                   |                                                                   |   |   |                                                                   |                                                                   |   |   |                                                                   |                                                                   |   |   |                                                                   |                                                                   |   |   |                                                                   |                                                                   |   |   |                                                                   |                                                                   |   |   |                                                                   |                                                                   |   |   |        |        |
| 1                                                            | 2                                                                 | 3                                                                  |   |   |                                                                   |                                                                   |   |                                                                                             |                                                                   |                                                                   |                 |   |                                                                   |                                                                   |   |   |                                                                   |                                                                   |   |   |                                                                   |                                                                   |   |   |                                                                   |                                                                   |   |   |                                                                   |                                                                   |   |   |                                                                   |                                                                   |   |   |                                                                   |                                                                   |   |   |                                                                   |                                                                   |   |   |                                                                   |                                                                   |   |   |        |        |
| 1                                                            | 2                                                                 | 3                                                                  |   |   |                                                                   |                                                                   |   |                                                                                             |                                                                   |                                                                   |                 |   |                                                                   |                                                                   |   |   |                                                                   |                                                                   |   |   |                                                                   |                                                                   |   |   |                                                                   |                                                                   |   |   |                                                                   |                                                                   |   |   |                                                                   |                                                                   |   |   |                                                                   |                                                                   |   |   |                                                                   |                                                                   |   |   |                                                                   |                                                                   |   |   |        |        |
| 1                                                            | 2                                                                 | 3                                                                  |   |   |                                                                   |                                                                   |   |                                                                                             |                                                                   |                                                                   |                 |   |                                                                   |                                                                   |   |   |                                                                   |                                                                   |   |   |                                                                   |                                                                   |   |   |                                                                   |                                                                   |   |   |                                                                   |                                                                   |   |   |                                                                   |                                                                   |   |   |                                                                   |                                                                   |   |   |                                                                   |                                                                   |   |   |                                                                   |                                                                   |   |   |        |        |
| Metal                                                        | <table border="1"><tr><td>1</td><td>2</td><td>3</td></tr></table> | 1                                                                  | 2 | 3 | <table border="1"><tr><td>1</td><td>2</td><td>3</td></tr></table> | 1                                                                 | 2 | 3                                                                                           | <table border="1"><tr><td>1</td><td>2</td><td>3</td></tr></table> | 1                                                                 | 2               | 3 | <table border="1"><tr><td>1</td><td>2</td><td>3</td></tr></table> | 1                                                                 | 2 | 3 | <table border="1"><tr><td>1</td><td>2</td><td>3</td></tr></table> | 1                                                                 | 2 | 3 | <table border="1"><tr><td>1</td><td>2</td><td>3</td></tr></table> | 1                                                                 | 2 | 3 | <table border="1"><tr><td>1</td><td>2</td><td>3</td></tr></table> | 1                                                                 | 2 | 3 | <table border="1"><tr><td>1</td><td>2</td><td>3</td></tr></table> | 1                                                                 | 2 | 3 | <table border="1"><tr><td>1</td><td>2</td><td>3</td></tr></table> | 1                                                                 | 2 | 3 | <table border="1"><tr><td>1</td><td>2</td><td>3</td></tr></table> | 1                                                                 | 2 | 3 | <table border="1"><tr><td>1</td><td>2</td><td>3</td></tr></table> | 1                                                                 | 2 | 3 | <table border="1"><tr><td>1</td><td>2</td><td>3</td></tr></table> | 1                                                                 | 2 | 3 | V37-41 |        |
| 1                                                            | 2                                                                 | 3                                                                  |   |   |                                                                   |                                                                   |   |                                                                                             |                                                                   |                                                                   |                 |   |                                                                   |                                                                   |   |   |                                                                   |                                                                   |   |   |                                                                   |                                                                   |   |   |                                                                   |                                                                   |   |   |                                                                   |                                                                   |   |   |                                                                   |                                                                   |   |   |                                                                   |                                                                   |   |   |                                                                   |                                                                   |   |   |                                                                   |                                                                   |   |   |        |        |
| 1                                                            | 2                                                                 | 3                                                                  |   |   |                                                                   |                                                                   |   |                                                                                             |                                                                   |                                                                   |                 |   |                                                                   |                                                                   |   |   |                                                                   |                                                                   |   |   |                                                                   |                                                                   |   |   |                                                                   |                                                                   |   |   |                                                                   |                                                                   |   |   |                                                                   |                                                                   |   |   |                                                                   |                                                                   |   |   |                                                                   |                                                                   |   |   |                                                                   |                                                                   |   |   |        |        |
| 1                                                            | 2                                                                 | 3                                                                  |   |   |                                                                   |                                                                   |   |                                                                                             |                                                                   |                                                                   |                 |   |                                                                   |                                                                   |   |   |                                                                   |                                                                   |   |   |                                                                   |                                                                   |   |   |                                                                   |                                                                   |   |   |                                                                   |                                                                   |   |   |                                                                   |                                                                   |   |   |                                                                   |                                                                   |   |   |                                                                   |                                                                   |   |   |                                                                   |                                                                   |   |   |        |        |
| 1                                                            | 2                                                                 | 3                                                                  |   |   |                                                                   |                                                                   |   |                                                                                             |                                                                   |                                                                   |                 |   |                                                                   |                                                                   |   |   |                                                                   |                                                                   |   |   |                                                                   |                                                                   |   |   |                                                                   |                                                                   |   |   |                                                                   |                                                                   |   |   |                                                                   |                                                                   |   |   |                                                                   |                                                                   |   |   |                                                                   |                                                                   |   |   |                                                                   |                                                                   |   |   |        |        |
| 1                                                            | 2                                                                 | 3                                                                  |   |   |                                                                   |                                                                   |   |                                                                                             |                                                                   |                                                                   |                 |   |                                                                   |                                                                   |   |   |                                                                   |                                                                   |   |   |                                                                   |                                                                   |   |   |                                                                   |                                                                   |   |   |                                                                   |                                                                   |   |   |                                                                   |                                                                   |   |   |                                                                   |                                                                   |   |   |                                                                   |                                                                   |   |   |                                                                   |                                                                   |   |   |        |        |
| 1                                                            | 2                                                                 | 3                                                                  |   |   |                                                                   |                                                                   |   |                                                                                             |                                                                   |                                                                   |                 |   |                                                                   |                                                                   |   |   |                                                                   |                                                                   |   |   |                                                                   |                                                                   |   |   |                                                                   |                                                                   |   |   |                                                                   |                                                                   |   |   |                                                                   |                                                                   |   |   |                                                                   |                                                                   |   |   |                                                                   |                                                                   |   |   |                                                                   |                                                                   |   |   |        |        |
| 1                                                            | 2                                                                 | 3                                                                  |   |   |                                                                   |                                                                   |   |                                                                                             |                                                                   |                                                                   |                 |   |                                                                   |                                                                   |   |   |                                                                   |                                                                   |   |   |                                                                   |                                                                   |   |   |                                                                   |                                                                   |   |   |                                                                   |                                                                   |   |   |                                                                   |                                                                   |   |   |                                                                   |                                                                   |   |   |                                                                   |                                                                   |   |   |                                                                   |                                                                   |   |   |        |        |
| 1                                                            | 2                                                                 | 3                                                                  |   |   |                                                                   |                                                                   |   |                                                                                             |                                                                   |                                                                   |                 |   |                                                                   |                                                                   |   |   |                                                                   |                                                                   |   |   |                                                                   |                                                                   |   |   |                                                                   |                                                                   |   |   |                                                                   |                                                                   |   |   |                                                                   |                                                                   |   |   |                                                                   |                                                                   |   |   |                                                                   |                                                                   |   |   |                                                                   |                                                                   |   |   |        |        |
| 1                                                            | 2                                                                 | 3                                                                  |   |   |                                                                   |                                                                   |   |                                                                                             |                                                                   |                                                                   |                 |   |                                                                   |                                                                   |   |   |                                                                   |                                                                   |   |   |                                                                   |                                                                   |   |   |                                                                   |                                                                   |   |   |                                                                   |                                                                   |   |   |                                                                   |                                                                   |   |   |                                                                   |                                                                   |   |   |                                                                   |                                                                   |   |   |                                                                   |                                                                   |   |   |        |        |
| 1                                                            | 2                                                                 | 3                                                                  |   |   |                                                                   |                                                                   |   |                                                                                             |                                                                   |                                                                   |                 |   |                                                                   |                                                                   |   |   |                                                                   |                                                                   |   |   |                                                                   |                                                                   |   |   |                                                                   |                                                                   |   |   |                                                                   |                                                                   |   |   |                                                                   |                                                                   |   |   |                                                                   |                                                                   |   |   |                                                                   |                                                                   |   |   |                                                                   |                                                                   |   |   |        |        |
| 1                                                            | 2                                                                 | 3                                                                  |   |   |                                                                   |                                                                   |   |                                                                                             |                                                                   |                                                                   |                 |   |                                                                   |                                                                   |   |   |                                                                   |                                                                   |   |   |                                                                   |                                                                   |   |   |                                                                   |                                                                   |   |   |                                                                   |                                                                   |   |   |                                                                   |                                                                   |   |   |                                                                   |                                                                   |   |   |                                                                   |                                                                   |   |   |                                                                   |                                                                   |   |   |        |        |
| 1                                                            | 2                                                                 | 3                                                                  |   |   |                                                                   |                                                                   |   |                                                                                             |                                                                   |                                                                   |                 |   |                                                                   |                                                                   |   |   |                                                                   |                                                                   |   |   |                                                                   |                                                                   |   |   |                                                                   |                                                                   |   |   |                                                                   |                                                                   |   |   |                                                                   |                                                                   |   |   |                                                                   |                                                                   |   |   |                                                                   |                                                                   |   |   |                                                                   |                                                                   |   |   |        |        |
| Plastic                                                      | <table border="1"><tr><td>1</td><td>2</td><td>3</td></tr></table> | 1                                                                  | 2 | 3 | <table border="1"><tr><td>1</td><td>2</td><td>3</td></tr></table> | 1                                                                 | 2 | 3                                                                                           | <table border="1"><tr><td>1</td><td>2</td><td>3</td></tr></table> | 1                                                                 | 2               | 3 | <table border="1"><tr><td>1</td><td>2</td><td>3</td></tr></table> | 1                                                                 | 2 | 3 | <table border="1"><tr><td>1</td><td>2</td><td>3</td></tr></table> | 1                                                                 | 2 | 3 | <table border="1"><tr><td>1</td><td>2</td><td>3</td></tr></table> | 1                                                                 | 2 | 3 | <table border="1"><tr><td>1</td><td>2</td><td>3</td></tr></table> | 1                                                                 | 2 | 3 | <table border="1"><tr><td>1</td><td>2</td><td>3</td></tr></table> | 1                                                                 | 2 | 3 | <table border="1"><tr><td>1</td><td>2</td><td>3</td></tr></table> | 1                                                                 | 2 | 3 | <table border="1"><tr><td>1</td><td>2</td><td>3</td></tr></table> | 1                                                                 | 2 | 3 | <table border="1"><tr><td>1</td><td>2</td><td>3</td></tr></table> | 1                                                                 | 2 | 3 | <table border="1"><tr><td>1</td><td>2</td><td>3</td></tr></table> | 1                                                                 | 2 | 3 | V42-46 |        |
| 1                                                            | 2                                                                 | 3                                                                  |   |   |                                                                   |                                                                   |   |                                                                                             |                                                                   |                                                                   |                 |   |                                                                   |                                                                   |   |   |                                                                   |                                                                   |   |   |                                                                   |                                                                   |   |   |                                                                   |                                                                   |   |   |                                                                   |                                                                   |   |   |                                                                   |                                                                   |   |   |                                                                   |                                                                   |   |   |                                                                   |                                                                   |   |   |                                                                   |                                                                   |   |   |        |        |
| 1                                                            | 2                                                                 | 3                                                                  |   |   |                                                                   |                                                                   |   |                                                                                             |                                                                   |                                                                   |                 |   |                                                                   |                                                                   |   |   |                                                                   |                                                                   |   |   |                                                                   |                                                                   |   |   |                                                                   |                                                                   |   |   |                                                                   |                                                                   |   |   |                                                                   |                                                                   |   |   |                                                                   |                                                                   |   |   |                                                                   |                                                                   |   |   |                                                                   |                                                                   |   |   |        |        |
| 1                                                            | 2                                                                 | 3                                                                  |   |   |                                                                   |                                                                   |   |                                                                                             |                                                                   |                                                                   |                 |   |                                                                   |                                                                   |   |   |                                                                   |                                                                   |   |   |                                                                   |                                                                   |   |   |                                                                   |                                                                   |   |   |                                                                   |                                                                   |   |   |                                                                   |                                                                   |   |   |                                                                   |                                                                   |   |   |                                                                   |                                                                   |   |   |                                                                   |                                                                   |   |   |        |        |
| 1                                                            | 2                                                                 | 3                                                                  |   |   |                                                                   |                                                                   |   |                                                                                             |                                                                   |                                                                   |                 |   |                                                                   |                                                                   |   |   |                                                                   |                                                                   |   |   |                                                                   |                                                                   |   |   |                                                                   |                                                                   |   |   |                                                                   |                                                                   |   |   |                                                                   |                                                                   |   |   |                                                                   |                                                                   |   |   |                                                                   |                                                                   |   |   |                                                                   |                                                                   |   |   |        |        |
| 1                                                            | 2                                                                 | 3                                                                  |   |   |                                                                   |                                                                   |   |                                                                                             |                                                                   |                                                                   |                 |   |                                                                   |                                                                   |   |   |                                                                   |                                                                   |   |   |                                                                   |                                                                   |   |   |                                                                   |                                                                   |   |   |                                                                   |                                                                   |   |   |                                                                   |                                                                   |   |   |                                                                   |                                                                   |   |   |                                                                   |                                                                   |   |   |                                                                   |                                                                   |   |   |        |        |
| 1                                                            | 2                                                                 | 3                                                                  |   |   |                                                                   |                                                                   |   |                                                                                             |                                                                   |                                                                   |                 |   |                                                                   |                                                                   |   |   |                                                                   |                                                                   |   |   |                                                                   |                                                                   |   |   |                                                                   |                                                                   |   |   |                                                                   |                                                                   |   |   |                                                                   |                                                                   |   |   |                                                                   |                                                                   |   |   |                                                                   |                                                                   |   |   |                                                                   |                                                                   |   |   |        |        |
| 1                                                            | 2                                                                 | 3                                                                  |   |   |                                                                   |                                                                   |   |                                                                                             |                                                                   |                                                                   |                 |   |                                                                   |                                                                   |   |   |                                                                   |                                                                   |   |   |                                                                   |                                                                   |   |   |                                                                   |                                                                   |   |   |                                                                   |                                                                   |   |   |                                                                   |                                                                   |   |   |                                                                   |                                                                   |   |   |                                                                   |                                                                   |   |   |                                                                   |                                                                   |   |   |        |        |
| 1                                                            | 2                                                                 | 3                                                                  |   |   |                                                                   |                                                                   |   |                                                                                             |                                                                   |                                                                   |                 |   |                                                                   |                                                                   |   |   |                                                                   |                                                                   |   |   |                                                                   |                                                                   |   |   |                                                                   |                                                                   |   |   |                                                                   |                                                                   |   |   |                                                                   |                                                                   |   |   |                                                                   |                                                                   |   |   |                                                                   |                                                                   |   |   |                                                                   |                                                                   |   |   |        |        |
| 1                                                            | 2                                                                 | 3                                                                  |   |   |                                                                   |                                                                   |   |                                                                                             |                                                                   |                                                                   |                 |   |                                                                   |                                                                   |   |   |                                                                   |                                                                   |   |   |                                                                   |                                                                   |   |   |                                                                   |                                                                   |   |   |                                                                   |                                                                   |   |   |                                                                   |                                                                   |   |   |                                                                   |                                                                   |   |   |                                                                   |                                                                   |   |   |                                                                   |                                                                   |   |   |        |        |
| 1                                                            | 2                                                                 | 3                                                                  |   |   |                                                                   |                                                                   |   |                                                                                             |                                                                   |                                                                   |                 |   |                                                                   |                                                                   |   |   |                                                                   |                                                                   |   |   |                                                                   |                                                                   |   |   |                                                                   |                                                                   |   |   |                                                                   |                                                                   |   |   |                                                                   |                                                                   |   |   |                                                                   |                                                                   |   |   |                                                                   |                                                                   |   |   |                                                                   |                                                                   |   |   |        |        |
| 1                                                            | 2                                                                 | 3                                                                  |   |   |                                                                   |                                                                   |   |                                                                                             |                                                                   |                                                                   |                 |   |                                                                   |                                                                   |   |   |                                                                   |                                                                   |   |   |                                                                   |                                                                   |   |   |                                                                   |                                                                   |   |   |                                                                   |                                                                   |   |   |                                                                   |                                                                   |   |   |                                                                   |                                                                   |   |   |                                                                   |                                                                   |   |   |                                                                   |                                                                   |   |   |        |        |
| 1                                                            | 2                                                                 | 3                                                                  |   |   |                                                                   |                                                                   |   |                                                                                             |                                                                   |                                                                   |                 |   |                                                                   |                                                                   |   |   |                                                                   |                                                                   |   |   |                                                                   |                                                                   |   |   |                                                                   |                                                                   |   |   |                                                                   |                                                                   |   |   |                                                                   |                                                                   |   |   |                                                                   |                                                                   |   |   |                                                                   |                                                                   |   |   |                                                                   |                                                                   |   |   |        |        |
| Other (Specify) _____                                        | <table border="1"><tr><td>1</td><td>2</td><td>3</td></tr></table> | 1                                                                  | 2 | 3 | <table border="1"><tr><td>1</td><td>2</td><td>3</td></tr></table> | 1                                                                 | 2 | 3                                                                                           | <table border="1"><tr><td>1</td><td>2</td><td>3</td></tr></table> | 1                                                                 | 2               | 3 | <table border="1"><tr><td>1</td><td>2</td><td>3</td></tr></table> | 1                                                                 | 2 | 3 | <table border="1"><tr><td>1</td><td>2</td><td>3</td></tr></table> | 1                                                                 | 2 | 3 | <table border="1"><tr><td>1</td><td>2</td><td>3</td></tr></table> | 1                                                                 | 2 | 3 | <table border="1"><tr><td>1</td><td>2</td><td>3</td></tr></table> | 1                                                                 | 2 | 3 | <table border="1"><tr><td>1</td><td>2</td><td>3</td></tr></table> | 1                                                                 | 2 | 3 | <table border="1"><tr><td>1</td><td>2</td><td>3</td></tr></table> | 1                                                                 | 2 | 3 | <table border="1"><tr><td>1</td><td>2</td><td>3</td></tr></table> | 1                                                                 | 2 | 3 | <table border="1"><tr><td>1</td><td>2</td><td>3</td></tr></table> | 1                                                                 | 2 | 3 | <table border="1"><tr><td>1</td><td>2</td><td>3</td></tr></table> | 1                                                                 | 2 | 3 | V47-51 |        |
| 1                                                            | 2                                                                 | 3                                                                  |   |   |                                                                   |                                                                   |   |                                                                                             |                                                                   |                                                                   |                 |   |                                                                   |                                                                   |   |   |                                                                   |                                                                   |   |   |                                                                   |                                                                   |   |   |                                                                   |                                                                   |   |   |                                                                   |                                                                   |   |   |                                                                   |                                                                   |   |   |                                                                   |                                                                   |   |   |                                                                   |                                                                   |   |   |                                                                   |                                                                   |   |   |        |        |
| 1                                                            | 2                                                                 | 3                                                                  |   |   |                                                                   |                                                                   |   |                                                                                             |                                                                   |                                                                   |                 |   |                                                                   |                                                                   |   |   |                                                                   |                                                                   |   |   |                                                                   |                                                                   |   |   |                                                                   |                                                                   |   |   |                                                                   |                                                                   |   |   |                                                                   |                                                                   |   |   |                                                                   |                                                                   |   |   |                                                                   |                                                                   |   |   |                                                                   |                                                                   |   |   |        |        |
| 1                                                            | 2                                                                 | 3                                                                  |   |   |                                                                   |                                                                   |   |                                                                                             |                                                                   |                                                                   |                 |   |                                                                   |                                                                   |   |   |                                                                   |                                                                   |   |   |                                                                   |                                                                   |   |   |                                                                   |                                                                   |   |   |                                                                   |                                                                   |   |   |                                                                   |                                                                   |   |   |                                                                   |                                                                   |   |   |                                                                   |                                                                   |   |   |                                                                   |                                                                   |   |   |        |        |
| 1                                                            | 2                                                                 | 3                                                                  |   |   |                                                                   |                                                                   |   |                                                                                             |                                                                   |                                                                   |                 |   |                                                                   |                                                                   |   |   |                                                                   |                                                                   |   |   |                                                                   |                                                                   |   |   |                                                                   |                                                                   |   |   |                                                                   |                                                                   |   |   |                                                                   |                                                                   |   |   |                                                                   |                                                                   |   |   |                                                                   |                                                                   |   |   |                                                                   |                                                                   |   |   |        |        |
| 1                                                            | 2                                                                 | 3                                                                  |   |   |                                                                   |                                                                   |   |                                                                                             |                                                                   |                                                                   |                 |   |                                                                   |                                                                   |   |   |                                                                   |                                                                   |   |   |                                                                   |                                                                   |   |   |                                                                   |                                                                   |   |   |                                                                   |                                                                   |   |   |                                                                   |                                                                   |   |   |                                                                   |                                                                   |   |   |                                                                   |                                                                   |   |   |                                                                   |                                                                   |   |   |        |        |
| 1                                                            | 2                                                                 | 3                                                                  |   |   |                                                                   |                                                                   |   |                                                                                             |                                                                   |                                                                   |                 |   |                                                                   |                                                                   |   |   |                                                                   |                                                                   |   |   |                                                                   |                                                                   |   |   |                                                                   |                                                                   |   |   |                                                                   |                                                                   |   |   |                                                                   |                                                                   |   |   |                                                                   |                                                                   |   |   |                                                                   |                                                                   |   |   |                                                                   |                                                                   |   |   |        |        |
| 1                                                            | 2                                                                 | 3                                                                  |   |   |                                                                   |                                                                   |   |                                                                                             |                                                                   |                                                                   |                 |   |                                                                   |                                                                   |   |   |                                                                   |                                                                   |   |   |                                                                   |                                                                   |   |   |                                                                   |                                                                   |   |   |                                                                   |                                                                   |   |   |                                                                   |                                                                   |   |   |                                                                   |                                                                   |   |   |                                                                   |                                                                   |   |   |                                                                   |                                                                   |   |   |        |        |
| 1                                                            | 2                                                                 | 3                                                                  |   |   |                                                                   |                                                                   |   |                                                                                             |                                                                   |                                                                   |                 |   |                                                                   |                                                                   |   |   |                                                                   |                                                                   |   |   |                                                                   |                                                                   |   |   |                                                                   |                                                                   |   |   |                                                                   |                                                                   |   |   |                                                                   |                                                                   |   |   |                                                                   |                                                                   |   |   |                                                                   |                                                                   |   |   |                                                                   |                                                                   |   |   |        |        |
| 1                                                            | 2                                                                 | 3                                                                  |   |   |                                                                   |                                                                   |   |                                                                                             |                                                                   |                                                                   |                 |   |                                                                   |                                                                   |   |   |                                                                   |                                                                   |   |   |                                                                   |                                                                   |   |   |                                                                   |                                                                   |   |   |                                                                   |                                                                   |   |   |                                                                   |                                                                   |   |   |                                                                   |                                                                   |   |   |                                                                   |                                                                   |   |   |                                                                   |                                                                   |   |   |        |        |
| 1                                                            | 2                                                                 | 3                                                                  |   |   |                                                                   |                                                                   |   |                                                                                             |                                                                   |                                                                   |                 |   |                                                                   |                                                                   |   |   |                                                                   |                                                                   |   |   |                                                                   |                                                                   |   |   |                                                                   |                                                                   |   |   |                                                                   |                                                                   |   |   |                                                                   |                                                                   |   |   |                                                                   |                                                                   |   |   |                                                                   |                                                                   |   |   |                                                                   |                                                                   |   |   |        |        |
| 1                                                            | 2                                                                 | 3                                                                  |   |   |                                                                   |                                                                   |   |                                                                                             |                                                                   |                                                                   |                 |   |                                                                   |                                                                   |   |   |                                                                   |                                                                   |   |   |                                                                   |                                                                   |   |   |                                                                   |                                                                   |   |   |                                                                   |                                                                   |   |   |                                                                   |                                                                   |   |   |                                                                   |                                                                   |   |   |                                                                   |                                                                   |   |   |                                                                   |                                                                   |   |   |        |        |
| 1                                                            | 2                                                                 | 3                                                                  |   |   |                                                                   |                                                                   |   |                                                                                             |                                                                   |                                                                   |                 |   |                                                                   |                                                                   |   |   |                                                                   |                                                                   |   |   |                                                                   |                                                                   |   |   |                                                                   |                                                                   |   |   |                                                                   |                                                                   |   |   |                                                                   |                                                                   |   |   |                                                                   |                                                                   |   |   |                                                                   |                                                                   |   |   |                                                                   |                                                                   |   |   |        |        |

**2.6. Please indicate on a scale of 1 to 5, with '1' being 'not at all' and '5' being 'to a large extent', whether the following will cause your household to recycle more:**

|                                                                                                                                                                                                    |                                               |   |                                               |   |                                               |   |                                               |   |                                               |   |     |
|----------------------------------------------------------------------------------------------------------------------------------------------------------------------------------------------------|-----------------------------------------------|---|-----------------------------------------------|---|-----------------------------------------------|---|-----------------------------------------------|---|-----------------------------------------------|---|-----|
|                                                                                                                                                                                                    | Not at all                                    |   |                                               |   | To a large extent                             |   |                                               |   |                                               |   |     |
| Provision of facilities for recycling as part of the kitchen layout (e.g., space for additional refuse bins)                                                                                       | <table border="1"><tr><td>1</td></tr></table> | 1 | <table border="1"><tr><td>2</td></tr></table> | 2 | <table border="1"><tr><td>3</td></tr></table> | 3 | <table border="1"><tr><td>4</td></tr></table> | 4 | <table border="1"><tr><td>5</td></tr></table> | 5 | V52 |
| 1                                                                                                                                                                                                  |                                               |   |                                               |   |                                               |   |                                               |   |                                               |   |     |
| 2                                                                                                                                                                                                  |                                               |   |                                               |   |                                               |   |                                               |   |                                               |   |     |
| 3                                                                                                                                                                                                  |                                               |   |                                               |   |                                               |   |                                               |   |                                               |   |     |
| 4                                                                                                                                                                                                  |                                               |   |                                               |   |                                               |   |                                               |   |                                               |   |     |
| 5                                                                                                                                                                                                  |                                               |   |                                               |   |                                               |   |                                               |   |                                               |   |     |
| Provision of facilities for recycling as part of the backyard (e.g., space for containers or additional wheelie-bins)                                                                              | <table border="1"><tr><td>1</td></tr></table> | 1 | <table border="1"><tr><td>2</td></tr></table> | 2 | <table border="1"><tr><td>3</td></tr></table> | 3 | <table border="1"><tr><td>4</td></tr></table> | 4 | <table border="1"><tr><td>5</td></tr></table> | 5 | V53 |
| 1                                                                                                                                                                                                  |                                               |   |                                               |   |                                               |   |                                               |   |                                               |   |     |
| 2                                                                                                                                                                                                  |                                               |   |                                               |   |                                               |   |                                               |   |                                               |   |     |
| 3                                                                                                                                                                                                  |                                               |   |                                               |   |                                               |   |                                               |   |                                               |   |     |
| 4                                                                                                                                                                                                  |                                               |   |                                               |   |                                               |   |                                               |   |                                               |   |     |
| 5                                                                                                                                                                                                  |                                               |   |                                               |   |                                               |   |                                               |   |                                               |   |     |
| Provision of a system whereby the body corporate/resident association arranges access for a recycling company to collect recyclables from collection points <u>inside</u> the complex/estate       | <table border="1"><tr><td>1</td></tr></table> | 1 | <table border="1"><tr><td>2</td></tr></table> | 2 | <table border="1"><tr><td>3</td></tr></table> | 3 | <table border="1"><tr><td>4</td></tr></table> | 4 | <table border="1"><tr><td>5</td></tr></table> | 5 | V54 |
| 1                                                                                                                                                                                                  |                                               |   |                                               |   |                                               |   |                                               |   |                                               |   |     |
| 2                                                                                                                                                                                                  |                                               |   |                                               |   |                                               |   |                                               |   |                                               |   |     |
| 3                                                                                                                                                                                                  |                                               |   |                                               |   |                                               |   |                                               |   |                                               |   |     |
| 4                                                                                                                                                                                                  |                                               |   |                                               |   |                                               |   |                                               |   |                                               |   |     |
| 5                                                                                                                                                                                                  |                                               |   |                                               |   |                                               |   |                                               |   |                                               |   |     |
| Provision of a system whereby the body corporate/resident association arranges access for a recycling company to collect recyclables from the kerbside (sidewalk) <u>inside</u> the complex/estate | <table border="1"><tr><td>1</td></tr></table> | 1 | <table border="1"><tr><td>2</td></tr></table> | 2 | <table border="1"><tr><td>3</td></tr></table> | 3 | <table border="1"><tr><td>4</td></tr></table> | 4 | <table border="1"><tr><td>5</td></tr></table> | 5 | V55 |
| 1                                                                                                                                                                                                  |                                               |   |                                               |   |                                               |   |                                               |   |                                               |   |     |
| 2                                                                                                                                                                                                  |                                               |   |                                               |   |                                               |   |                                               |   |                                               |   |     |
| 3                                                                                                                                                                                                  |                                               |   |                                               |   |                                               |   |                                               |   |                                               |   |     |
| 4                                                                                                                                                                                                  |                                               |   |                                               |   |                                               |   |                                               |   |                                               |   |     |
| 5                                                                                                                                                                                                  |                                               |   |                                               |   |                                               |   |                                               |   |                                               |   |     |
| Other (Specify) _____                                                                                                                                                                              | <table border="1"><tr><td>1</td></tr></table> | 1 | <table border="1"><tr><td>2</td></tr></table> | 2 | <table border="1"><tr><td>3</td></tr></table> | 3 | <table border="1"><tr><td>4</td></tr></table> | 4 | <table border="1"><tr><td>5</td></tr></table> | 5 | V56 |
| 1                                                                                                                                                                                                  |                                               |   |                                               |   |                                               |   |                                               |   |                                               |   |     |
| 2                                                                                                                                                                                                  |                                               |   |                                               |   |                                               |   |                                               |   |                                               |   |     |
| 3                                                                                                                                                                                                  |                                               |   |                                               |   |                                               |   |                                               |   |                                               |   |     |
| 4                                                                                                                                                                                                  |                                               |   |                                               |   |                                               |   |                                               |   |                                               |   |     |
| 5                                                                                                                                                                                                  |                                               |   |                                               |   |                                               |   |                                               |   |                                               |   |     |

**2.7. Please share any further thoughts you may have about recycling in enclosed residential developments:**

---



---



---



---

**THANK YOU FOR YOUR TIME!**

In order for the supervisors to conduct random spot-checks, please provide a phone number OR email address so that we may contact you if necessary. Remember all your information will remain anonymous.

Phone: \_\_\_\_\_ or Email: \_\_\_\_\_
